# Supplementary material for: Antimicrobial Evaluation of Sequentially extracted Leaf of Vernonia auriculifera Hiern (Rejicho)
Source: Research Square preprint supplement (doi:10.21203/rs.3.rs-1557195/v1), 2022-04-21

# Appendix

A: Pictures showing macroscopic and microscopic study.

A1: the adult shrub of *V. auriculifera*


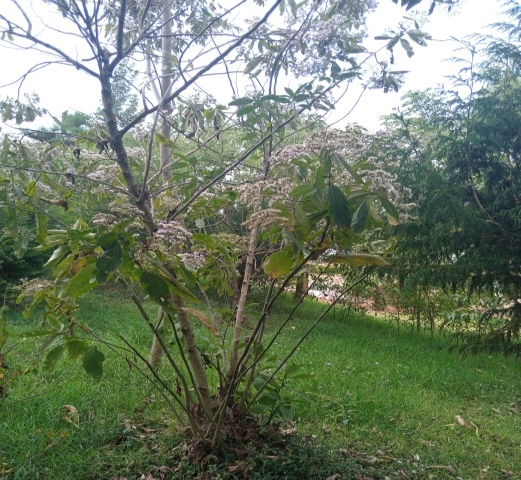


(a)

**B:** Extraction and phytochemical screening

B1: Maceration (a), Extraction (b), and Crude extracts (c) Hexane extract


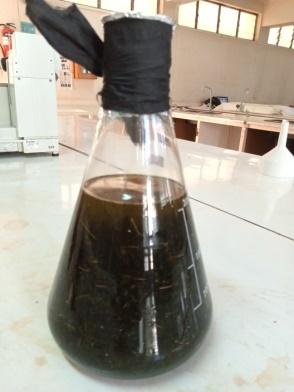

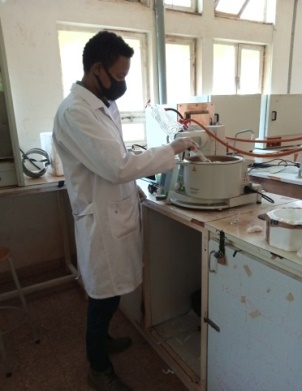

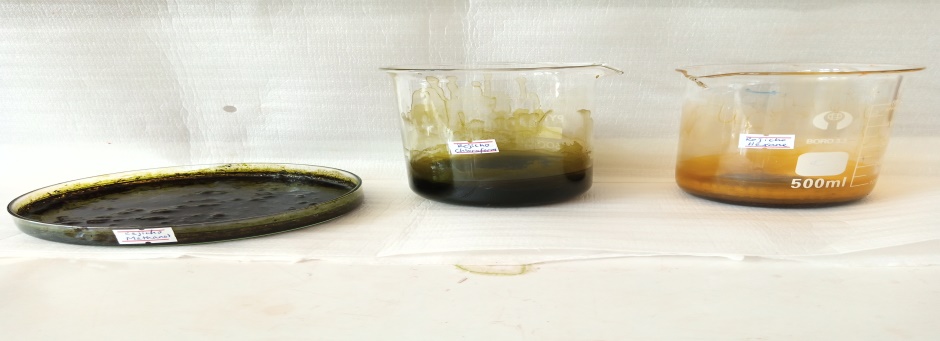


1. (b) (c)

B2: phytochemical screening of n-hexane (e), chloroform (f) and methanol (g) extracts


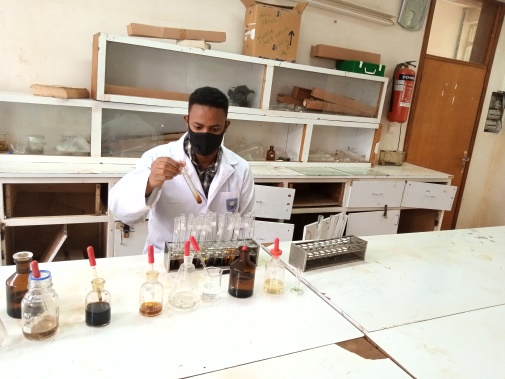

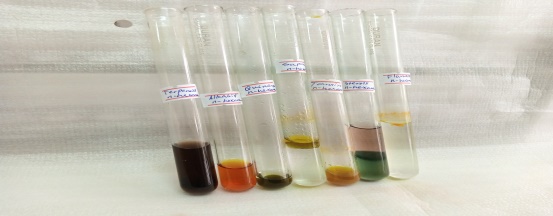


(d) (e)


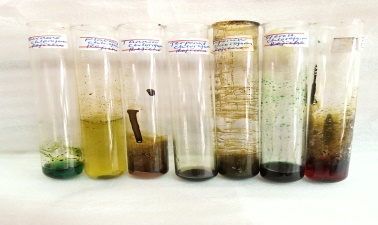

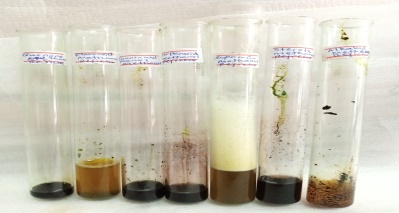


(f) (g)

**C**: pictures of microorganisms’ growth inhibition and MIC

C1: growth inhibition of *E. coli* (a), *S. typhi*(b), *S. aureus*(c) and *C. albican*(d)


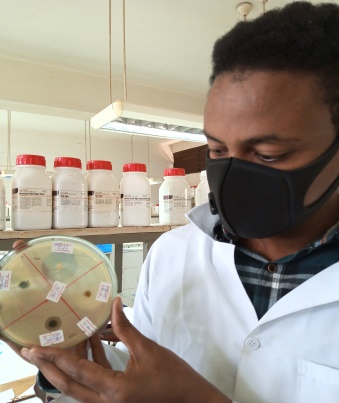

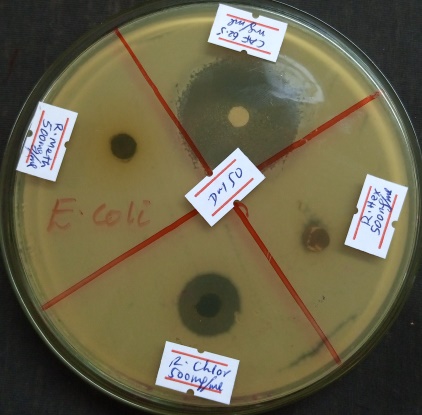

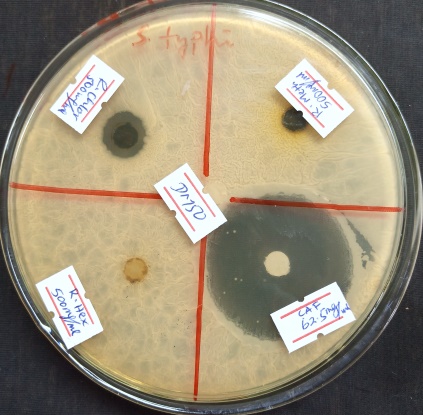


(a) (b)


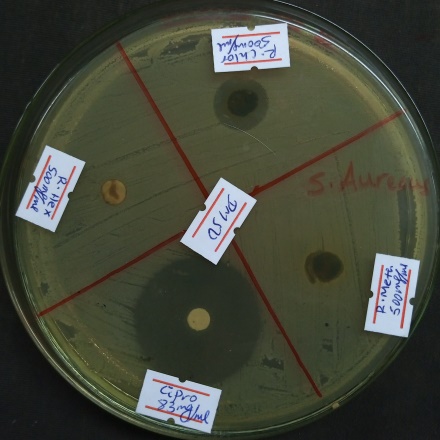

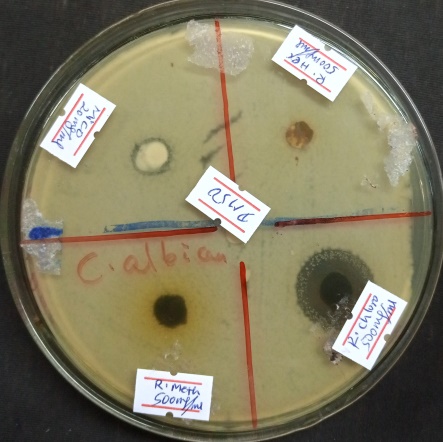


(c) (d)

C2: Minimum inhibitory concentration of three solvent extracts of *V. auriculifera*


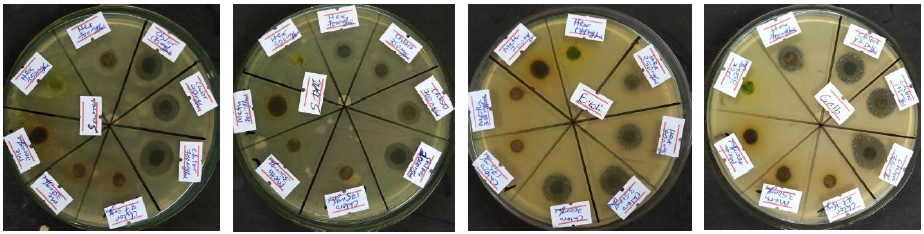

Supplement: Supplementary file 1 [file bc70f9061e21572d9b3e4551.docx]
